# Supplementary material for: Twenty-year survival following lung transplantation
Source: PubMed Central journal article supplement — J Thorac Dis. 2023 May 24;15(6):2997–3012. doi: 10.21037/jtd-22-1414 (PMC10323557; doi:10.21037/jtd-22-1414), 2023-05-24
Supplement: jtd-15-06-2997-supplementary.pdf [file jtd-15-06-2997-supplementary.pdf]

Table S1 Univariable and multivariable cox regression: 5-year survival

| Variable                       | Univariable  |         | Multivariable |         |
|--------------------------------|--------------|---------|---------------|---------|
|                                | Hazard ratio | P value | Hazard ratio  | P value |
| Recipient factors              |              |         |               |         |
| Age (years)                    |              |         |               |         |
| 18–24                          | 1.34         | 0.001   | 2.02          | <0.001  |
| 25–34                          | 0.85         | 0.018   | 1.25          | 0.051   |
| 35–44                          | 0.82         | 0.001   | 1.03          | 0.764   |
| 45–54                          | 0.86         | 0.001   | Reference     |         |
| 55–64                          | 1.22         | <0.001  | 1.20          | 0.002   |
| ≥65                            | 1.39         | 0.001   | 1.40          | 0.004   |
| Blood group                    |              |         |               |         |
| A                              | 0.96         | 0.380   |               |         |
| B                              | 0.98         | 0.742   |               |         |
| O                              | 1.03         | 0.517   |               |         |
| AB                             | 1.10         | 0.308   |               |         |
| BMI                            |              |         |               |         |
| <18.5                          | 0.97         | 0.571   |               |         |
| 18.5–24.9                      | 0.94         | 0.150   |               |         |
| 25.0–29.9                      | 1.08         | 0.095   |               |         |
| 30.0–34.9                      | 1.04         | 0.570   |               |         |
| 35.0–39.9                      | 1.01         | 0.935   |               |         |
| ≥40.0                          | 1.58         | 0.265   |               |         |
| Diagnosis                      |              |         |               |         |
| Alpha-1-antitrypsin deficiency | 0.85         | 0.025   | Reference     |         |
| COPD/emphysema                 | 1.16         | <0.001  | 1.12          | 0.104   |
| Cystic fibrosis                | 0.87         | 0.025   | 0.95          | 0.666   |
| IPF/UIP                        | 1.17         | 0.005   | 1.14          | 0.114   |
| Pulmonary hypertension         | 0.78         | 0.015   | 1.04          | 0.787   |
| GFR (mL/min)                   |              |         |               |         |
| <10                            | 1.91         | 0.016   | 1.73          | 0.103   |
| 10–19                          | 0.89         | 0.820   |               |         |
| 20–29                          | 1.50         | 0.164   |               |         |
| 30–39                          | 1.15         | 0.423   |               |         |
| 40–49                          | 1.01         | 0.952   |               |         |
| ≥50                            | 0.88         | 0.152   |               |         |
| Life support before transplant | 0.90         | 0.412   |               |         |

Table S1 (continued)

**Table S1** (continued)

| Variable                          | Univariable  |         | Multivariable |         |
|-----------------------------------|--------------|---------|---------------|---------|
|                                   | Hazard ratio | P value | Hazard ratio  | P value |
| Waitlist time                     |              |         |               |         |
| <6 months                         | 1.16         | <0.001  | 1.00          | 0.993   |
| 6 months to 1 year                | 1.11         | 0.032   | Reference     |         |
| 1–2 years                         | 0.91         | 0.035   | 0.92          | 0.213   |
| >2 years                          | 0.73         | <0.001  | 0.79          | 0.003   |
| Donor/transplant factors          |              |         |               |         |
| Donor age (years)                 |              |         |               |         |
| <15                               | 1.06         | 0.489   |               |         |
| 15–24                             | 0.92         | 0.051   |               |         |
| 25–34                             | 0.98         | 0.706   |               |         |
| 35–44                             | 1.03         | 0.610   |               |         |
| 45–54                             | 1.10         | 0.096   |               |         |
| ≥55                               | 1.10         | 0.349   |               |         |
| Donor cause of death              |              |         |               |         |
| CVA                               | 1.09         | 0.040   | 1.18          | 0.001   |
| Anoxia                            | 0.70         | 0.002   | 0.78          | 0.045   |
| Head trauma                       | 0.93         | 0.065   |               |         |
| Donor cigarette use               | 1.10         | 0.044   | 1.08          | 0.132   |
| Donor ethnicity: African American | 1.06         | 0.049   | 1.00          | 0.898   |
| Donor GFR (mL/min)                |              |         |               |         |
| <10                               | 0.97         | 0.889   |               |         |
| 10–19                             | 1.06         | 0.749   |               |         |
| 20–29                             | 1.36         | 0.018   | 1.47          | 0.008   |
| 30–39                             | 0.92         | 0.468   |               |         |
| 40–49                             | 1.11         | 0.206   |               |         |
| ≥50                               | 0.92         | 0.140   |               |         |
| Gender match                      |              |         |               |         |
| Male to male                      | 1.05         | 0.251   |               |         |
| Male to female                    | 1.05         | 0.249   |               |         |
| Female to male                    | 1.04         | 0.591   |               |         |
| Female to female                  | 0.88         | 0.007   | 0.89          | 0.034   |
| ABO incompatible                  | 1.02         | 0.968   |               |         |

**Table S1** (continued)

**Table S1** (continued)

| Variable                     | Univariable  |         | Multivariable |         |
|------------------------------|--------------|---------|---------------|---------|
|                              | Hazard ratio | P value | Hazard ratio  | P value |
| HLA mismatch level           |              |         |               |         |
| 0                            | 2.51         | 0.194   |               |         |
| 1                            | 0.85         | 0.563   |               |         |
| 2                            | 0.82         | 0.085   |               |         |
| 3                            | 0.87         | 0.032   | 0.86          | 0.052   |
| 4                            | 1.00         | 0.981   |               |         |
| 5                            | 1.00         | 0.919   |               |         |
| 6                            | 1.13         | 0.011   | 1.06          | 0.278   |
| Ischemic time (hours)        |              |         |               |         |
| <1.0                         | 0.96         | 0.879   |               |         |
| 1.0–1.9                      | 1.35         | <0.001  | 1.25          | 0.036   |
| 2.0–2.9                      | 1.14         | 0.016   | 1.04          | 0.589   |
| 3.0–3.9                      | 1.13         | 0.008   | 1.06          | 0.413   |
| 4.0–4.9                      | 1.00         | 0.930   |               |         |
| ≥5.0                         | 0.77         | <0.001  | 0.96          | 0.527   |
| Size match: undersized donor | 0.96         | 0.586   |               |         |
| Size match: oversized donor  | 0.98         | 0.761   |               |         |
| Unilateral lung transplant   | 1.38         | <0.001  | 1.18          | 0.013   |

P<0.05 is significant on multivariable analysis.

**Table S2** Propensity score matching for unilateral transplant negates difference in ischemia time

| Variable                   |           | 20+ year survivors | 1–20 year survivors | Bias percent reduction | P value |
|----------------------------|-----------|--------------------|---------------------|------------------------|---------|
| Unilateral transplant (%)  | Unmatched | 23.5%              | 63.6%               |                        | <0.001  |
|                            | Matched   | 23.5%              | 23.5%               | 100%                   | 1.000   |
| Cold ischemia time (hours) | Unmatched | 5.20               | 4.39                |                        | <0.001  |
|                            | Matched   | 5.20               | 5.23                | 97.3%                  | 0.858   |

**Table S3** Female recipients with male versus female donors matched using significant variables from *Tables 1-3*

| Variable                   |         | Male donor | Female donor | Bias percent reduction | P value |
|----------------------------|---------|------------|--------------|------------------------|---------|
| Recipient age (years)      | Matched | 48.9       | 48.6         | 1.9                    | 0.709   |
| Recipient BMI              | Matched | 23.0       | 23.0         | 0.7                    | 0.884   |
| Blood Group A              | Matched | 40.1%      | 41.1%        | -2.1                   | 0.682   |
| Blood Group B              | Matched | 12.1%      | 10.5%        | 4.8                    | 0.340   |
| Blood Group O              | Matched | 43.8%      | 43.3%        | 1.0                    | 0.839   |
| Blood Group AB             | Matched | 4.1%       | 5.1%         | -4.8                   | 0.335   |
| Alpha-1-antitrypsin        | Matched | 7.5%       | 6.3%         | 4.4                    | 0.372   |
| Cystic fibrosis            | Matched | 11.4%      | 12.9%        | -4.6                   | 0.356   |
| COPD/emphysema             | Matched | 51.4%      | 52.2%        | -1.5                   | 0.762   |
| IPF/UIP                    | Matched | 11.4%      | 9.6%         | 5.8                    | 0.251   |
| Pulmonary hypertension     | Matched | 6.0%       | 6.0%         | 0.0                    | 1.000   |
| Recipient GFR (mL/min)     | Matched | 91.3       | 89.4         | 6.3                    | 0.208   |
| Waitlist time (years)      | Matched | 1.1        | 1.2          | -8.9                   | 0.081   |
| Donor age (years)          | Matched | 26.1       | 32.6         | -51.2                  | 0.000   |
| African American donor     | Matched | 32.7%      | 21.6%        | 16.8                   | 0.001   |
| Donor cigarette use        | Matched | 25.1%      | 31.5%        | -14.0                  | 0.005   |
| Donor: recipient height    | Matched | 1.1        | 1.0          | 53.5                   | 0.000   |
| Donor GFR (mL/min)         | Matched | 75.4       | 86.6         | -27.4                  | 0.000   |
| Cold ischemia time (hours) | Matched | 4.3        | 4.5          | -9.8                   | 0.053   |
| HLA mismatch level         | Matched | 4.6        | 4.6          | -4.1                   | 0.414   |
| Unilateral lung transplant | Matched | 61.5%      | 55.2%        | 12.9                   | 0.011   |

**Table S4** Multivariable cox regression for graft survival

| Variable                       | 20-year survival |         | 10-year survival |         |
|--------------------------------|------------------|---------|------------------|---------|
|                                | Hazard ratio     | P value | Hazard ratio     | P value |
| Recipient factors              |                  |         |                  |         |
| Age (years)                    |                  |         |                  |         |
| 18–24                          |                  |         |                  |         |
| 25–34                          | 0.78             | <0.001  | 0.60             | <0.001  |
| 35–44                          | 0.84             | <0.001  | 0.56             | <0.001  |
| 45–54                          |                  |         | 0.58             | <0.001  |
| 55–64                          | 1.23             | <0.001  | 0.72             | 0.005   |
| ≥65                            | 1.47             | <0.001  | 0.84             | 0.232   |
| Blood group                    |                  |         |                  |         |
| A                              | 1.03             | 0.520   | 0.96             | 0.268   |
| B                              |                  |         |                  |         |
| O                              | 1.10             | 0.063   |                  |         |
| AB                             | 1.21             | 0.023   | 1.18             | 0.047   |
| BMI                            |                  |         |                  |         |
| <18.5                          | 0.90             | 0.427   | 0.96             | 0.544   |
| 18.5–24.9                      | 0.84             | 0.176   | 0.91             | 0.122   |
| 25.0–29.9                      | 0.96             | 0.774   | 1.02             | 0.739   |
| 30.0–34.9                      | 0.94             | 0.637   |                  |         |
| ≥35.0                          |                  |         |                  |         |
| Diagnosis                      |                  |         |                  |         |
| Alpha-1-antitrypsin deficiency |                  |         | Reference        |         |
| COPD/emphysema                 | 1.11             | 0.021   | 1.13             | 0.023   |
| Cystic fibrosis                | 1.08             | 0.215   | 1.03             | 0.705   |
| IPF/UIP                        | 1.02             | 0.741   | 1.03             | 0.597   |
| Pulmonary hypertension         | 0.97             | 0.774   | 1.03             | 0.782   |
| GFR (mL/min)                   |                  |         |                  |         |
| <10                            | 1.86             | 0.021   | 2.03             | 0.011   |
| ≥10                            |                  |         |                  |         |
| Life support before transplant | 0.97             | 0.712   | 0.88             | 0.223   |
| Waitlist time                  |                  |         |                  |         |
| <6 months                      | 0.96             | 0.382   | 0.98             | 0.633   |
| 6 months to 1 year             | Reference        |         | Reference        |         |
| 1–2 years                      | 0.89             | 0.007   | 0.91             | 0.047   |
| >2 years                       | 0.79             | <0.001  | 0.81             | <0.001  |

Table S4 (continued)

Table S4 (continued)

| Variable                          | 20-year survival |         | 10-year survival |         |
|-----------------------------------|------------------|---------|------------------|---------|
|                                   | Hazard ratio     | P value | Hazard ratio     | P value |
| Donor/transplant factors          |                  |         |                  |         |
| Donor age (years)                 |                  |         |                  |         |
| <35                               |                  |         |                  |         |
| 35–44                             | 1.04             | 0.275   | 1.08             | 0.075   |
| ≥45                               |                  |         |                  |         |
| Donor cause of death              |                  |         |                  |         |
| CVA                               | Reference        |         | Reference        |         |
| Anoxia                            | 0.89             | 0.108   | 0.83             | 0.035   |
| Head trauma                       | 0.92             | 0.018   | 0.92             | 0.023   |
| Donor cigarette use               | 1.07             | 0.038   | 1.06             | 0.129   |
| Donor ethnicity: African American | 1.04             | 0.078   | 1.03             | 0.259   |
| Donor GFR (mL/min)                |                  |         |                  |         |
| <20                               |                  |         |                  |         |
| 20–29                             | 1.25             | 0.032   | 1.31             | 0.017   |
| ≥30                               |                  |         |                  |         |
| Gender match                      |                  |         |                  |         |
| Male to male                      | 0.95             | 0.179   |                  |         |
| Male to female                    |                  |         |                  |         |
| Female to male                    |                  |         |                  |         |
| Female to female                  | 0.87             | <0.001  | 0.88             | 0.002   |
| HLA mismatch level                |                  |         |                  |         |
| ≤2                                |                  |         |                  |         |
| 3                                 | 0.89             | 0.011   | 0.87             | 0.011   |
| 4                                 |                  |         |                  |         |
| 5                                 |                  |         |                  |         |
| 6                                 |                  |         | 1.09             | 0.034   |
| Ischemic time (hours)             |                  |         |                  |         |
| <1.0                              |                  |         |                  |         |
| 1.0–1.9                           | 1.18             | 0.023   | 1.20             | 0.023   |
| 2.0–2.9                           | 1.06             | 0.221   | 1.07             | 0.225   |
| 3.0–3.9                           | 1.04             | 0.326   | 1.08             | 0.130   |
| 4.0–4.9                           |                  |         |                  |         |
| ≥5.0                              | 1.01             | 0.849   | 0.99             | 0.869   |
| Unilateral lung transplant        | 1.30             | <0.001  | 1.29             | <0.001  |

P<0.05 is significant on multivariable analysis.

**Table S5** 1–20-year survivors subgroup analysis by graft versus non-graft cause of death

|                                       | Graft failure (N=1,100) | Non-graft (N=4,600) | P value |
|---------------------------------------|-------------------------|---------------------|---------|
| Preoperative characteristics          |                         |                     |         |
| Age (years)                           | 48.6 (12.0)             | 49.8 (11.4)         | 0.002   |
| BMI (kg/m <sup>2</sup> )              | 23.5 (4.8)              | 23.5 (4.7)          | 0.88    |
| Blood group                           |                         |                     |         |
| A                                     | 433 (39.4%)             | 1,909 (41.5%)       | 0.2     |
| B                                     | 129 (11.7%)             | 493 (10.7%)         | 0.33    |
| O                                     | 488 (44.4%)             | 1,977 (43.0%)       | 0.4     |
| AB                                    | 49 (4.5%)               | 220 (4.8%)          | 0.64    |
| Diagnosis                             |                         |                     |         |
| Alpha-1-antitrypsin deficiency        | 103 (9.4%)              | 458 (10.0%)         | 0.55    |
| COPD/emphysema                        | 515 (46.8%)             | 2,231 (48.5%)       | 0.32    |
| Cystic fibrosis                       | 137 (12.5%)             | 534 (11.6%)         | 0.43    |
| IPF/UIP                               | 54 (4.9%)               | 195 (4.2%)          | 0.33    |
| Pulmonary hypertension                | 152 (13.8%)             | 664 (14.4%)         | 0.6     |
| Male recipient                        | 507 (46.1%)             | 2,260 (49.1%)       | 0.07    |
| African American recipient            | 70 (6.4%)               | 257 (5.6%)          | 0.32    |
| Waitlist time (years), mean (SD)      | 1.0 (1.0)               | 1.0 (0.9)           | 0.26    |
| Donor age (years), mean (SD)          | 30.7 (13.2)             | 30.2 (12.8)         | 0.22    |
| Male donor                            | 709 (64.5%)             | 2,979 (64.8%)       | 0.85    |
| African American donor                | 150 (13.6%)             | 617 (13.4%)         | 0.85    |
| Donor cigarette use                   | 262 (23.8%)             | 1,092 (23.7%)       | 0.96    |
| Donor creatinine, mean (SD)           | 1.2 (1.9)               | 1.2 (1.7)           | 0.79    |
| Donor COD                             |                         |                     |         |
| Anoxia                                | 51 (4.6%)               | 180 (3.9%)          | 0.27    |
| CVA/Stroke                            | 368 (33.5%)             | 1,545 (33.6%)       | 0.93    |
| Head Trauma                           | 547 (49.7%)             | 2,341 (50.9%)       | 0.49    |
| Perioperative characteristics         |                         |                     |         |
| Hospital admission                    | 59 (5.4%)               | 211 (4.6%)          | 0.28    |
| ICU admission                         | 17 (1.5%)               | 85 (1.8%)           | 0.5     |
| Cold ischemia time (hours), mean (SD) | 4.5 (1.7)               | 4.4 (1.7)           | 0.11    |
| Recipient creatinine, mean (SD)       | 0.9 (1.2)               | 0.9 (1.3)           | 0.66    |
| Life support                          | 26 (2.4%)               | 130 (2.8%)          | 0.4     |

Table S5 (continued)

Table S5 (continued)

|                                   | Graft failure (N=1,100) | Non-graft (N=4,600) | P value |
|-----------------------------------|-------------------------|---------------------|---------|
| ABO matching                      |                         |                     |         |
| Identical                         | 1,020 (92.7%)           | 4,193 (91.2%)       | 0.093   |
| Compatible                        | 79 (7.2%)               | 405 (8.8%)          | 0.083   |
| Incompatible                      | 1 (0.1%)                | 2 (0.0%)            | 0.54    |
| HLA mismatch level                |                         |                     |         |
| 0                                 | 1 (0.1%)                | 1 (0.0%)            | 0.27    |
| 1                                 | 3 (0.3%)                | 20 (0.4%)           | 0.45    |
| 2                                 | 33 (3.0%)               | 126 (2.7%)          | 0.64    |
| 3                                 | 98 (8.9%)               | 461 (10.0%)         | 0.26    |
| 4                                 | 237 (21.5%)             | 1,047 (22.8%)       | 0.39    |
| 5                                 | 314 (28.5%)             | 1,351 (29.4%)       | 0.59    |
| 6                                 | 186 (16.9%)             | 780 (17.0%)         | 0.97    |
| Gender match (donor to recipient) |                         |                     |         |
| Male to male                      | 411 (37.4%)             | 1,836 (39.9%)       | 0.12    |
| Male to female                    | 298 (27.1%)             | 1,143 (24.8%)       | 0.12    |
| Female to female                  | 96 (8.7%)               | 424 (9.2%)          | 0.61    |
| Female to male                    | 295 (26.8%)             | 1,197 (26.0%)       | 0.59    |
| Single lung transplant            | 643 (58.5%)             | 2,985 (64.9%)       | <0.001  |

P<0.05 is significant.
